# Supplementary material for: Red Pepper Seeds Inhibit Hepatic Lipid Accumulation by Inducing Autophagy via AMPK Activation
Source: MDPI journal article supplement (doi:10.3390/nu14204247), 2022-10-12
Supplement: s1 [file s1]

# Red Pepper Seeds Inhibit Hepatic Lipid Accumulation by Inducing Autophagy via AMPK Activation

Young-Hyun Lee <sup>1,†</sup>, Hwa-Jin Kim <sup>1,†</sup>, Mikyoung You <sup>2,†</sup> and Hyeon-A Kim <sup>1,\*</sup>

<sup>1</sup>Department of Food and Nutrition, Mokpo National University, Muan-gun 58554, Korea

<sup>2</sup>Nutrition Research Institute, University of North Carolina, Chapel Hill, NC 28081, USA

<sup>†</sup> These authors contributed equally to this work.

## Inventory of Supplemental Information

### Supplemental Tables

- **Table S1.** List of primary antibodies
- **Table S2.** Liver weight in HFD-fed with RPS treatment.

**Table S1.** List of primary antibodies.

| Antibody | Host   | Dilution | Company                  | Catalog no. |
|----------|--------|----------|--------------------------|-------------|
| SREBP-1c | Rabbit | 1:1000   | Santa Cruz Biotechnology | SC-366      |
| FAS      | Rabbit | 1:1000   | Cell Signaling           | 3180        |
| FABP1    | Rabbit | 1:1000   | Cell Signaling           | 3544        |
| p-ACC    | Rabbit | 1:1000   | Cell Signaling           | 3661        |
| ACC      | Rabbit | 1:1000   | Cell Signaling           | 3662        |
| LC3      | Rabbit | 1:1000   | Cell Signaling           | 2775        |
| p62      | Rabbit | 1:1000   | Cell Signaling           | 23214       |
| Beclin 1 | Rabbit | 1:1000   | Cell Signaling           | 3495        |
| Atg3     | Rabbit | 1:1000   | Cell Signaling           | 3415        |
| Atg5-12  | Rabbit | 1:1000   | Cell Signaling           | 4180        |
| p-AMPK   | Rabbit | 1:1000   | Cell Signaling           | 2535        |
| AMPK     | Rabbit | 1:1000   | Cell Signaling           | 2532        |
| p-mTOR   | Rabbit | 1:1000   | Cell Signaling           | 5536        |
| mTOR     | Rabbit | 1:1000   | Cell Signaling           | 2983        |
| Atg5     | Rabbit | 1:1000   | Cell Signaling           | 12994       |
| Atg12    | Rabbit | 1:1000   | Cell Signaling           | 4180        |
| β-actin  | Mouse  | 1:1000   | Santa Cruz Biotechnology | sc-47778    |

**Table S2.** Liver weight in HFD-fed with RPS treatment.

| Groups     | Liver weight (g) |
|------------|------------------|
| ND-C       | 0.92 ± 0.03      |
| HFD-C      | 1.00 ± 0.03      |
| HFD_RPS100 | 0.96 ± 0.02      |
| HFD_RPS200 | 0.92 ± 0.05      |
